# Supplementary material
Source: HighWire-hosted journal article supplement (http://ajnr-stage2.highwire.org/highwire/filestream/182673/field_highwire_adjunct_files/0/17-01316.pdf)
Supplement: 17-01316.pdf [file 17-01316.pdf]

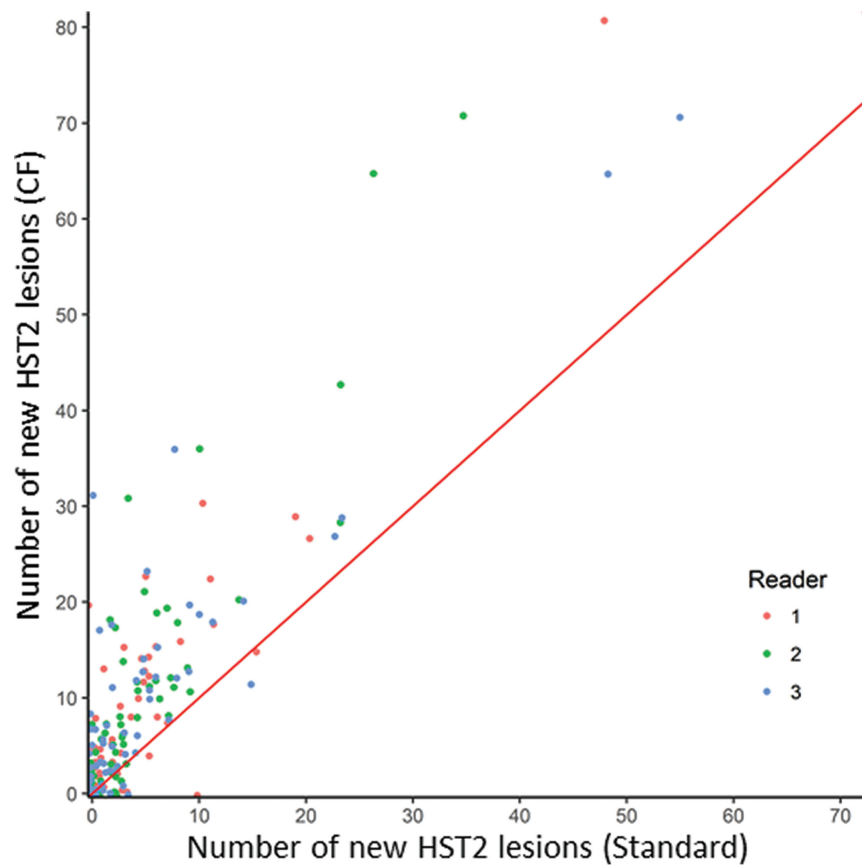

**ON-LINE FIGURE.** Projection of the number of new HST2 lesions for each reader. Results are shown according to the CF method (on the y axis) or the standard one (on the x axis). The *red line* represents a similar detection rate for both techniques.
